# Supplementary material for: Carbazole-based molecular tweezers as platforms for the discrimination of heavy metal ions
Source: Royal Society of Chemistry journal article supplement (doi:10.1039/c4ra13221a), 2014-11-26
Supplement: c4ra13221a1.pdf [file c4ra13221a1.pdf]

## **Supporting Information**

### **Carbazole-based molecular tweezers as platforms for the discrimination of heavy metal ions**

In-Hwan Hwang, Kyeong-Im Hong, Kyu-Sung Jeong, and Woo-Dong Jang

**Table S1.** Normalized fluorescence intensities used in chemometric analyses of compound **1-8** upon additions of metal ions (5 eq.) (Total 5 trials).

|                  | 1     | 2     | 3     | 4     | 5     | 6     | 7     | 8     |
|------------------|-------|-------|-------|-------|-------|-------|-------|-------|
| Ag <sup>+</sup>  | 0.000 | 0.939 | 0.936 | 0.054 | 0.000 | 0.334 | 0.291 | 0.002 |
| As <sup>3+</sup> | 0.916 | 0.945 | 0.067 | 0.001 | 0.935 | 0.944 | 0.058 | 0.000 |
| Au <sup>3+</sup> | 0.875 | 0.743 | 0.455 | 0.075 | 0.743 | 0.637 | 0.608 | 0.129 |
| Cd <sup>2+</sup> | 0.949 | 0.679 | 0.664 | 0.823 | 0.972 | 0.956 | 0.949 | 0.944 |
| Co <sup>2+</sup> | 0.945 | 0.013 | 0.031 | 0.901 | 0.950 | 0.405 | 0.406 | 0.838 |
| Cr <sup>3+</sup> | 0.933 | 0.937 | 0.746 | 0.913 | 0.942 | 0.932 | 0.641 | 0.683 |
| Cu <sup>2+</sup> | 0.930 | 0.000 | 0.005 | 0.898 | 0.863 | 0.007 | 0.005 | 0.827 |
| Fe <sup>2+</sup> | 0.921 | 0.390 | 0.296 | 0.926 | 0.936 | 0.947 | 0.911 | 0.979 |
| Fe <sup>3+</sup> | 0.186 | 0.018 | 0.000 | 0.000 | 0.038 | 0.028 | 0.003 | 0.000 |
| Hg <sup>2+</sup> | 0.000 | 0.282 | 0.283 | 0.003 | 0.000 | 0.002 | 0.001 | 0.001 |
| Mn <sup>2+</sup> | 0.919 | 0.933 | 0.922 | 0.906 | 0.919 | 0.935 | 0.937 | 0.865 |
| Ni <sup>2+</sup> | 0.923 | 0.001 | 0.006 | 0.897 | 0.938 | 0.798 | 0.140 | 0.953 |
| Pb <sup>2+</sup> | 0.917 | 0.919 | 0.920 | 0.938 | 0.949 | 0.946 | 0.947 | 0.979 |
| Pd <sup>2+</sup> | 0.789 | 0.517 | 0.003 | 0.001 | 0.727 | 0.392 | 0.001 | 0.001 |
| Pt <sup>2+</sup> | 0.915 | 0.913 | 0.923 | 0.883 | 0.918 | 0.922 | 0.932 | 0.856 |
| Ru <sup>3+</sup> | 0.666 | 0.641 | 0.595 | 0.448 | 0.480 | 0.413 | 0.342 | 0.383 |
| Se <sup>4+</sup> | 0.906 | 0.903 | 0.038 | 0.002 | 0.906 | 0.900 | 0.030 | 0.000 |
| Sn <sup>2+</sup> | 0.935 | 0.916 | 0.914 | 0.943 | 0.933 | 0.943 | 0.977 | 0.788 |
| Zn <sup>2+</sup> | 0.927 | 0.820 | 0.756 | 0.932 | 0.949 | 0.394 | 0.472 | 0.967 |

|                  | 1     | 2     | 3     | 4     | 5     | 6     | 7     | 8     |
|------------------|-------|-------|-------|-------|-------|-------|-------|-------|
| Ag <sup>+</sup>  | 0.000 | 0.955 | 0.952 | 0.057 | 0.000 | 0.326 | 0.304 | 0.002 |
| As <sup>3+</sup> | 0.937 | 0.954 | 0.062 | 0.001 | 0.949 | 0.944 | 0.036 | 0.001 |
| Au <sup>3+</sup> | 0.785 | 0.738 | 0.418 | 0.001 | 0.739 | 0.565 | 0.583 | 0.139 |
| Cd <sup>2+</sup> | 0.936 | 0.655 | 0.728 | 0.792 | 0.980 | 0.970 | 0.968 | 0.960 |
| Co <sup>2+</sup> | 0.932 | 0.027 | 0.087 | 0.866 | 0.975 | 0.431 | 0.396 | 0.844 |
| Cr <sup>3+</sup> | 0.940 | 0.944 | 0.766 | 0.867 | 0.961 | 0.940 | 0.657 | 0.602 |
| Cu <sup>2+</sup> | 0.920 | 0.000 | 0.005 | 0.858 | 0.897 | 0.004 | 0.004 | 0.828 |
| Fe <sup>2+</sup> | 0.924 | 0.394 | 0.376 | 0.895 | 0.974 | 0.951 | 0.951 | 0.962 |
| Fe <sup>3+</sup> | 0.150 | 0.023 | 0.000 | 0.001 | 0.033 | 0.000 | 0.000 | 0.000 |
| Hg <sup>2+</sup> | 0.000 | 0.309 | 0.309 | 0.000 | 0.000 | 0.001 | 0.001 | 0.001 |
| Mn <sup>2+</sup> | 0.930 | 0.938 | 0.954 | 0.873 | 0.958 | 0.946 | 0.972 | 0.888 |
| Ni <sup>2+</sup> | 0.926 | 0.001 | 0.006 | 0.860 | 0.977 | 0.845 | 0.188 | 0.933 |
| Pb <sup>2+</sup> | 0.931 | 0.934 | 0.943 | 0.936 | 0.972 | 0.955 | 0.986 | 0.961 |
| Pd <sup>2+</sup> | 0.829 | 0.515 | 0.003 | 0.000 | 0.807 | 0.367 | 0.001 | 0.000 |
| Pt <sup>2+</sup> | 0.934 | 0.929 | 0.939 | 0.850 | 0.948 | 0.923 | 0.951 | 0.883 |
| Ru <sup>3+</sup> | 0.664 | 0.633 | 0.597 | 0.435 | 0.483 | 0.370 | 0.339 | 0.394 |
| Se <sup>4+</sup> | 0.919 | 0.910 | 0.054 | 0.000 | 0.934 | 0.914 | 0.022 | 0.000 |
| Sn <sup>2+</sup> | 0.946 | 0.931 | 0.943 | 0.891 | 0.972 | 0.949 | 0.995 | 0.778 |
| Zn <sup>2+</sup> | 0.940 | 0.826 | 0.757 | 0.907 | 0.966 | 0.346 | 0.305 | 0.986 |

|                  | 1     | 2     | 3     | 4     | 5     | 6     | 7     | 8     |
|------------------|-------|-------|-------|-------|-------|-------|-------|-------|
| Ag <sup>+</sup>  | 0.000 | 0.955 | 0.952 | 0.057 | 0.000 | 0.326 | 0.304 | 0.002 |
| As <sup>3+</sup> | 0.937 | 0.954 | 0.062 | 0.001 | 0.949 | 0.944 | 0.036 | 0.001 |
| Au <sup>3+</sup> | 0.785 | 0.738 | 0.418 | 0.001 | 0.739 | 0.565 | 0.583 | 0.139 |
| Cd <sup>2+</sup> | 0.936 | 0.655 | 0.728 | 0.792 | 0.980 | 0.970 | 0.968 | 0.960 |
| Co <sup>2+</sup> | 0.932 | 0.027 | 0.087 | 0.866 | 0.975 | 0.431 | 0.396 | 0.844 |
| Cr <sup>3+</sup> | 0.940 | 0.944 | 0.766 | 0.867 | 0.961 | 0.940 | 0.657 | 0.602 |
| Cu <sup>2+</sup> | 0.920 | 0.000 | 0.005 | 0.858 | 0.897 | 0.004 | 0.004 | 0.828 |
| Fe <sup>2+</sup> | 0.924 | 0.394 | 0.376 | 0.895 | 0.974 | 0.951 | 0.951 | 0.962 |
| Fe <sup>3+</sup> | 0.150 | 0.023 | 0.000 | 0.001 | 0.033 | 0.000 | 0.000 | 0.000 |
| Hg <sup>2+</sup> | 0.000 | 0.309 | 0.309 | 0.000 | 0.000 | 0.001 | 0.001 | 0.001 |
| Mn <sup>2+</sup> | 0.930 | 0.938 | 0.954 | 0.873 | 0.958 | 0.946 | 0.972 | 0.888 |
| Ni <sup>2+</sup> | 0.926 | 0.001 | 0.006 | 0.860 | 0.977 | 0.845 | 0.188 | 0.933 |
| Pb <sup>2+</sup> | 0.931 | 0.934 | 0.943 | 0.936 | 0.972 | 0.955 | 0.986 | 0.961 |
| Pd <sup>2+</sup> | 0.829 | 0.515 | 0.003 | 0.000 | 0.807 | 0.367 | 0.001 | 0.000 |
| Pt <sup>2+</sup> | 0.934 | 0.929 | 0.939 | 0.850 | 0.948 | 0.923 | 0.951 | 0.883 |
| Ru <sup>3+</sup> | 0.664 | 0.633 | 0.597 | 0.435 | 0.483 | 0.370 | 0.339 | 0.394 |
| Se <sup>4+</sup> | 0.919 | 0.910 | 0.054 | 0.000 | 0.934 | 0.914 | 0.022 | 0.000 |
| Sn <sup>2+</sup> | 0.946 | 0.931 | 0.943 | 0.891 | 0.972 | 0.949 | 0.995 | 0.778 |
| Zn <sup>2+</sup> | 0.940 | 0.826 | 0.757 | 0.907 | 0.966 | 0.346 | 0.305 | 0.986 |

|                  | 1     | 2     | 3     | 4     | 5     | 6     | 7     | 8     |
|------------------|-------|-------|-------|-------|-------|-------|-------|-------|
| Ag <sup>+</sup>  | 0.003 | 0.943 | 0.950 | 0.080 | 0.000 | 0.420 | 0.256 | 0.002 |
| As <sup>3+</sup> | 0.942 | 0.955 | 0.064 | 0.001 | 0.951 | 0.949 | 0.038 | 0.000 |
| Au <sup>3+</sup> | 0.819 | 0.743 | 0.426 | 0.053 | 0.707 | 0.562 | 0.546 | 0.001 |
| Cd <sup>2+</sup> | 0.946 | 0.693 | 0.526 | 0.818 | 0.986 | 0.937 | 0.924 | 0.916 |
| Co <sup>2+</sup> | 0.940 | 0.019 | 0.039 | 0.882 | 0.990 | 0.500 | 0.519 | 0.805 |
| Cr <sup>3+</sup> | 0.950 | 0.947 | 0.792 | 0.892 | 0.978 | 0.910 | 0.712 | 0.574 |
| Cu <sup>2+</sup> | 0.935 | 0.000 | 0.005 | 0.868 | 0.932 | 0.007 | 0.006 | 0.790 |
| Fe <sup>2+</sup> | 0.932 | 0.449 | 0.333 | 0.901 | 0.981 | 0.932 | 0.888 | 0.918 |
| Fe <sup>3+</sup> | 0.205 | 0.020 | 0.000 | 0.000 | 0.025 | 0.000 | 0.000 | 0.000 |
| Hg <sup>2+</sup> | 0.004 | 0.301 | 0.317 | 0.002 | 0.000 | 0.001 | 0.001 | 0.001 |
| Mn <sup>2+</sup> | 0.938 | 0.924 | 0.941 | 0.901 | 0.944 | 0.938 | 0.951 | 0.847 |
| Ni <sup>2+</sup> | 0.930 | 0.001 | 0.006 | 0.834 | 0.987 | 0.803 | 0.174 | 0.890 |
| Pb <sup>2+</sup> | 0.932 | 0.923 | 0.934 | 0.929 | 0.986 | 0.921 | 0.950 | 0.949 |
| Pd <sup>2+</sup> | 0.828 | 0.572 | 0.003 | 0.001 | 0.813 | 0.405 | 0.001 | 0.000 |
| Pt <sup>2+</sup> | 0.918 | 0.917 | 0.926 | 0.845 | 0.969 | 0.905 | 0.923 | 0.843 |
| Ru <sup>3+</sup> | 0.658 | 0.632 | 0.556 | 0.467 | 0.478 | 0.383 | 0.332 | 0.376 |
| Se <sup>4+</sup> | 0.911 | 0.908 | 0.056 | 0.001 | 0.943 | 0.904 | 0.029 | 0.000 |
| Sn <sup>2+</sup> | 0.937 | 0.932 | 0.937 | 0.903 | 0.980 | 0.928 | 0.964 | 0.742 |
| Zn <sup>2+</sup> | 0.939 | 0.828 | 0.739 | 0.906 | 0.988 | 0.343 | 0.328 | 0.940 |

|                  | 1     | 2     | 3     | 4     | 5     | 6     | 7     | 8     |
|------------------|-------|-------|-------|-------|-------|-------|-------|-------|
| Ag <sup>+</sup>  | 0.001 | 0.952 | 0.925 | 0.037 | 0.000 | 0.361 | 0.217 | 0.002 |
| As <sup>3+</sup> | 0.946 | 0.953 | 0.046 | 0.000 | 0.946 | 0.996 | 0.050 | 0.000 |
| Au <sup>3+</sup> | 0.822 | 0.743 | 0.416 | 0.076 | 0.747 | 0.563 | 0.594 | 0.112 |
| Cd <sup>2+</sup> | 0.953 | 0.739 | 0.698 | 0.706 | 0.975 | 0.959 | 0.936 | 0.922 |
| Co <sup>2+</sup> | 0.953 | 0.025 | 0.045 | 0.803 | 0.971 | 0.556 | 0.410 | 0.798 |
| Cr <sup>3+</sup> | 0.946 | 0.947 | 0.744 | 0.815 | 0.961 | 0.938 | 0.660 | 0.684 |
| Cu <sup>2+</sup> | 0.941 | 0.000 | 0.005 | 0.793 | 0.913 | 0.009 | 0.008 | 0.869 |
| Fe <sup>2+</sup> | 0.947 | 0.433 | 0.338 | 0.858 | 0.962 | 0.953 | 0.894 | 0.901 |
| Fe <sup>3+</sup> | 0.145 | 0.024 | 0.000 | 0.001 | 0.030 | 0.030 | 0.005 | 0.000 |
| Hg <sup>2+</sup> | 0.000 | 0.385 | 0.368 | 0.001 | 0.000 | 0.001 | 0.001 | 0.001 |
| Mn <sup>2+</sup> | 0.933 | 0.951 | 0.926 | 0.846 | 0.954 | 0.946 | 0.943 | 0.930 |
| Ni <sup>2+</sup> | 0.939 | 0.001 | 0.006 | 0.877 | 0.960 | 0.862 | 0.132 | 0.869 |
| Pb <sup>2+</sup> | 0.937 | 0.954 | 0.926 | 0.900 | 0.956 | 0.944 | 0.971 | 0.956 |
| Pd <sup>2+</sup> | 0.844 | 0.615 | 0.003 | 0.000 | 0.805 | 0.298 | 0.000 | 0.000 |
| Pt <sup>2+</sup> | 0.919 | 0.936 | 0.912 | 0.805 | 0.935 | 0.924 | 0.938 | 0.876 |
| Ru <sup>3+</sup> | 0.646 | 0.643 | 0.477 | 0.421 | 0.447 | 0.388 | 0.331 | 0.347 |
| Se <sup>4+</sup> | 0.917 | 0.940 | 0.050 | 0.000 | 0.930 | 0.888 | 0.052 | 0.002 |
| Sn <sup>2+</sup> | 0.931 | 0.954 | 0.930 | 0.850 | 0.961 | 0.957 | 0.981 | 0.966 |
| Zn <sup>2+</sup> | 0.944 | 0.880 | 0.777 | 0.860 | 0.960 | 0.477 | 0.458 | 0.980 |

**Table S2.** Normalized fluorescence intensities used in chemometric analyses of compound **1-8** upon additions of metal ions (10 eq.) (Total 5 trials).

|                  | 1     | 2     | 3     | 4     | 5     | 6     | 7     | 8     |
|------------------|-------|-------|-------|-------|-------|-------|-------|-------|
| Ag <sup>+</sup>  | 0.001 | 0.927 | 0.933 | 0.021 | 0.000 | 0.063 | 0.046 | 0.000 |
| As <sup>3+</sup> | 0.932 | 0.926 | 0.090 | 0.001 | 0.928 | 0.949 | 0.048 | 0.001 |
| Au <sup>3+</sup> | 0.619 | 0.285 | 0.010 | 0.009 | 0.552 | 0.005 | 0.000 | 0.000 |
| Cd <sup>2+</sup> | 0.918 | 0.680 | 0.642 | 0.748 | 0.957 | 0.948 | 0.933 | 0.898 |
| Co <sup>2+</sup> | 0.921 | 0.001 | 0.005 | 0.860 | 0.957 | 0.517 | 0.413 | 0.709 |
| Cr <sup>3+</sup> | 0.919 | 0.936 | 0.443 | 0.797 | 0.950 | 0.944 | 0.385 | 0.247 |
| Cu <sup>2+</sup> | 0.927 | 0.000 | 0.005 | 0.953 | 0.845 | 0.002 | 0.002 | 0.826 |
| Fe <sup>2+</sup> | 0.917 | 0.418 | 0.470 | 0.892 | 0.910 | 0.906 | 0.885 | 0.904 |
| Fe <sup>3+</sup> | 0.000 | 0.000 | 0.000 | 0.002 | 0.000 | 0.000 | 0.000 | 0.000 |
| Hg <sup>2+</sup> | 0.000 | 0.182 | 0.217 | 0.002 | 0.001 | 0.001 | 0.001 | 0.001 |
| Mn <sup>2+</sup> | 0.903 | 0.939 | 0.943 | 0.913 | 0.950 | 0.882 | 0.912 | 0.867 |
| Ni <sup>2+</sup> | 0.916 | 0.000 | 0.004 | 0.925 | 0.962 | 0.763 | 0.128 | 0.956 |
| Pb <sup>2+</sup> | 0.908 | 0.921 | 0.938 | 0.936 | 0.949 | 0.902 | 0.964 | 0.931 |
| Pd <sup>2+</sup> | 0.774 | 0.246 | 0.003 | 0.002 | 0.694 | 0.248 | 0.001 | 0.000 |
| Pt <sup>2+</sup> | 0.891 | 0.880 | 0.907 | 0.960 | 0.922 | 0.920 | 0.953 | 0.977 |
| Ru <sup>3+</sup> | 0.416 | 0.446 | 0.312 | 0.255 | 0.239 | 0.124 | 0.054 | 0.020 |
| Se <sup>4+</sup> | 0.875 | 0.875 | 0.008 | 0.001 | 0.883 | 0.873 | 0.005 | 0.001 |
| Sn <sup>2+</sup> | 0.907 | 0.925 | 0.904 | 0.791 | 0.950 | 0.920 | 0.920 | 0.295 |
| Zn <sup>2+</sup> | 0.910 | 0.869 | 0.729 | 0.925 | 0.954 | 0.220 | 0.250 | 0.935 |

|                  | 1     | 2     | 3     | 4     | 5     | 6     | 7     | 8     |
|------------------|-------|-------|-------|-------|-------|-------|-------|-------|
| Ag <sup>+</sup>  | 0.001 | 0.938 | 0.960 | 0.004 | 0.000 | 0.039 | 0.058 | 0.002 |
| As <sup>3+</sup> | 0.937 | 0.925 | 0.081 | 0.002 | 0.924 | 0.917 | 0.089 | 0.001 |
| Au <sup>3+</sup> | 0.684 | 0.254 | 0.029 | 0.001 | 0.561 | 0.030 | 0.024 | 0.009 |
| Cd <sup>2+</sup> | 0.934 | 0.676 | 0.644 | 0.705 | 0.982 | 0.974 | 0.876 | 0.917 |
| Co <sup>2+</sup> | 0.906 | 0.001 | 0.005 | 0.724 | 0.984 | 0.476 | 0.393 | 0.631 |
| Cr <sup>3+</sup> | 0.918 | 0.943 | 0.472 | 0.814 | 0.957 | 0.949 | 0.336 | 0.233 |
| Cu <sup>2+</sup> | 0.922 | 0.000 | 0.005 | 0.880 | 0.837 | 0.003 | 0.003 | 0.842 |
| Fe <sup>2+</sup> | 0.921 | 0.438 | 0.464 | 0.826 | 0.975 | 0.956 | 0.874 | 0.974 |
| Fe <sup>3+</sup> | 0.001 | 0.000 | 0.000 | 0.001 | 0.000 | 0.001 | 0.000 | 0.000 |
| Hg <sup>2+</sup> | 0.000 | 0.140 | 0.259 | 0.002 | 0.000 | 0.000 | 0.001 | 0.001 |
| Mn <sup>2+</sup> | 0.916 | 0.935 | 0.951 | 0.928 | 0.976 | 0.966 | 0.903 | 0.829 |
| Ni <sup>2+</sup> | 0.922 | 0.001 | 0.004 | 0.849 | 0.985 | 0.772 | 0.124 | 0.871 |
| Pb <sup>2+</sup> | 0.910 | 0.919 | 0.958 | 0.874 | 0.984 | 0.969 | 0.903 | 0.931 |
| Pd <sup>2+</sup> | 0.776 | 0.267 | 0.003 | 0.001 | 0.758 | 0.267 | 0.001 | 0.000 |
| Pt <sup>2+</sup> | 0.891 | 0.885 | 0.912 | 0.931 | 0.929 | 0.933 | 0.949 | 0.969 |
| Ru <sup>3+</sup> | 0.433 | 0.446 | 0.353 | 0.095 | 0.229 | 0.132 | 0.065 | 0.050 |
| Se <sup>4+</sup> | 0.874 | 0.858 | 0.009 | 0.001 | 0.871 | 0.871 | 0.003 | 0.001 |
| Sn <sup>2+</sup> | 0.912 | 0.904 | 0.903 | 0.677 | 0.977 | 0.981 | 0.902 | 0.343 |
| Zn <sup>2+</sup> | 0.921 | 0.850 | 0.714 | 0.831 | 0.985 | 0.251 | 0.252 | 0.899 |

|                  | 1     | 2     | 3     | 4     | 5     | 6     | 7     | 8     |
|------------------|-------|-------|-------|-------|-------|-------|-------|-------|
| Ag <sup>+</sup>  | 0.001 | 0.952 | 0.953 | 0.028 | 0.000 | 0.032 | 0.022 | 0.001 |
| As <sup>3+</sup> | 0.901 | 0.951 | 0.055 | 0.001 | 0.923 | 0.933 | 0.126 | 0.001 |
| Au <sup>3+</sup> | 0.716 | 0.319 | 0.095 | 0.001 | 0.654 | 0.104 | 0.031 | 0.001 |
| Cd <sup>2+</sup> | 0.950 | 0.678 | 0.663 | 0.713 | 0.979 | 0.949 | 0.907 | 0.840 |
| Co <sup>2+</sup> | 0.937 | 0.001 | 0.005 | 0.816 | 0.947 | 0.495 | 0.392 | 0.639 |
| Cr <sup>3+</sup> | 0.932 | 0.965 | 0.472 | 0.814 | 0.967 | 0.954 | 0.357 | 0.297 |
| Cu <sup>2+</sup> | 0.923 | 0.000 | 0.005 | 0.948 | 0.816 | 0.003 | 0.002 | 0.815 |
| Fe <sup>2+</sup> | 0.940 | 0.508 | 0.426 | 0.862 | 0.968 | 0.947 | 0.902 | 0.876 |
| Fe <sup>3+</sup> | 0.039 | 0.000 | 0.000 | 0.000 | 0.000 | 0.000 | 0.000 | 0.000 |
| Hg <sup>2+</sup> | 0.000 | 0.168 | 0.256 | 0.003 | 0.000 | 0.002 | 0.001 | 0.001 |
| Mn <sup>2+</sup> | 0.929 | 0.978 | 0.954 | 0.908 | 0.960 | 0.941 | 0.935 | 0.826 |
| Ni <sup>2+</sup> | 0.941 | 0.001 | 0.003 | 0.880 | 0.963 | 0.760 | 0.101 | 0.964 |
| Pb <sup>2+</sup> | 0.943 | 0.967 | 0.958 | 0.895 | 0.971 | 0.940 | 0.958 | 0.925 |
| Pd <sup>2+</sup> | 0.805 | 0.233 | 0.003 | 0.001 | 0.767 | 0.237 | 0.001 | 0.000 |
| Pt <sup>2+</sup> | 0.886 | 0.953 | 0.915 | 0.960 | 0.921 | 0.927 | 0.939 | 0.985 |
| Ru <sup>3+</sup> | 0.414 | 0.501 | 0.346 | 0.119 | 0.221 | 0.103 | 0.058 | 0.061 |
| Se <sup>4+</sup> | 0.878 | 0.924 | 0.009 | 0.000 | 0.881 | 0.872 | 0.004 | 0.001 |
| Sn <sup>2+</sup> | 0.943 | 0.960 | 0.923 | 0.785 | 0.966 | 0.950 | 0.940 | 0.334 |
| Zn <sup>2+</sup> | 0.938 | 0.848 | 0.715 | 0.999 | 0.977 | 0.249 | 0.249 | 0.891 |

|                  | 1     | 2     | 3     | 4     | 5     | 6     | 7     | 8     |
|------------------|-------|-------|-------|-------|-------|-------|-------|-------|
| Ag <sup>+</sup>  | 0.039 | 0.950 | 0.932 | 0.023 | 0.000 | 0.028 | 0.023 | 0.001 |
| As <sup>3+</sup> | 0.888 | 0.949 | 0.051 | 0.001 | 0.920 | 0.931 | 0.031 | 0.001 |
| Au <sup>3+</sup> | 0.789 | 0.285 | 0.019 | 0.002 | 0.563 | 0.009 | 0.001 | 0.001 |
| Cd <sup>2+</sup> | 0.926 | 0.664 | 0.655 | 0.698 | 0.968 | 0.978 | 0.900 | 0.788 |
| Co <sup>2+</sup> | 0.949 | 0.001 | 0.004 | 0.817 | 0.971 | 0.456 | 0.366 | 0.660 |
| Cr <sup>3+</sup> | 0.938 | 0.920 | 0.492 | 0.849 | 0.948 | 0.963 | 0.390 | 0.320 |
| Cu <sup>2+</sup> | 0.882 | 0.000 | 0.005 | 0.872 | 0.872 | 0.002 | 0.002 | 0.813 |
| Fe <sup>2+</sup> | 0.952 | 0.477 | 0.556 | 0.812 | 0.949 | 0.961 | 0.831 | 0.878 |
| Fe <sup>3+</sup> | 0.043 | 0.000 | 0.000 | 0.002 | 0.000 | 0.000 | 0.000 | 0.000 |
| Hg <sup>2+</sup> | 0.004 | 0.148 | 0.234 | 0.005 | 0.001 | 0.001 | 0.001 | 0.001 |
| Mn <sup>2+</sup> | 0.949 | 0.922 | 0.955 | 0.902 | 0.952 | 0.960 | 0.950 | 0.812 |
| Ni <sup>2+</sup> | 0.941 | 0.001 | 0.005 | 0.852 | 0.970 | 0.757 | 0.129 | 0.922 |
| Pb <sup>2+</sup> | 0.947 | 0.920 | 0.940 | 0.894 | 0.966 | 0.960 | 0.950 | 0.934 |
| Pd <sup>2+</sup> | 0.798 | 0.267 | 0.003 | 0.002 | 0.670 | 0.196 | 0.001 | 0.000 |
| Pt <sup>2+</sup> | 0.869 | 0.891 | 0.918 | 0.960 | 0.920 | 0.925 | 0.943 | 0.980 |
| Ru <sup>3+</sup> | 0.465 | 0.458 | 0.366 | 0.091 | 0.195 | 0.071 | 0.041 | 0.021 |
| Se <sup>4+</sup> | 0.871 | 0.868 | 0.007 | 0.002 | 0.866 | 0.867 | 0.005 | 0.001 |
| Sn <sup>2+</sup> | 0.958 | 0.909 | 0.917 | 0.676 | 0.960 | 0.965 | 0.973 | 0.382 |
| Zn <sup>2+</sup> | 0.952 | 0.827 | 0.757 | 0.928 | 0.977 | 0.227 | 0.220 | 0.821 |

|                  | 1     | 2     | 3     | 4     | 5     | 6     | 7     | 8     |
|------------------|-------|-------|-------|-------|-------|-------|-------|-------|
| Ag <sup>+</sup>  | 0.003 | 0.950 | 0.856 | 0.032 | 0.042 | 0.073 | 0.062 | 0.001 |
| As <sup>3+</sup> | 0.897 | 0.930 | 0.092 | 0.000 | 0.911 | 0.937 | 0.032 | 0.001 |
| Au <sup>3+</sup> | 0.661 | 0.262 | 0.051 | 0.004 | 0.551 | 0.057 | 0.003 | 0.008 |
| Cd <sup>2+</sup> | 0.974 | 0.651 | 0.665 | 0.696 | 0.996 | 0.952 | 0.978 | 0.815 |
| Co <sup>2+</sup> | 0.914 | 0.001 | 0.038 | 0.796 | 0.942 | 0.507 | 0.391 | 0.628 |
| Cr <sup>3+</sup> | 0.937 | 0.939 | 0.452 | 0.831 | 0.969 | 0.961 | 0.395 | 0.297 |
| Cu <sup>2+</sup> | 0.927 | 0.000 | 0.040 | 0.895 | 0.819 | 0.004 | 0.052 | 0.804 |
| Fe <sup>2+</sup> | 0.821 | 0.458 | 0.426 | 0.800 | 0.974 | 0.977 | 0.854 | 0.835 |
| Fe <sup>3+</sup> | 0.077 | 0.000 | 0.003 | 0.006 | 0.001 | 0.005 | 0.000 | 0.009 |
| Hg <sup>2+</sup> | 0.000 | 0.160 | 0.202 | 0.022 | 0.003 | 0.002 | 0.003 | 0.009 |
| Mn <sup>2+</sup> | 0.877 | 0.934 | 0.878 | 0.918 | 0.948 | 0.982 | 0.991 | 0.909 |
| Ni <sup>2+</sup> | 0.993 | 0.001 | 0.004 | 0.820 | 0.961 | 0.773 | 0.112 | 0.898 |
| Pb <sup>2+</sup> | 0.871 | 0.946 | 0.843 | 0.948 | 0.917 | 0.923 | 0.973 | 0.907 |
| Pd <sup>2+</sup> | 0.734 | 0.279 | 0.000 | 0.004 | 0.663 | 0.230 | 0.000 | 0.004 |
| Pt <sup>2+</sup> | 0.888 | 0.914 | 0.917 | 0.998 | 0.918 | 0.927 | 0.939 | 0.945 |
| Ru <sup>3+</sup> | 0.372 | 0.473 | 0.338 | 0.346 | 0.181 | 0.122 | 0.064 | 0.066 |
| Se <sup>4+</sup> | 0.874 | 0.897 | 0.013 | 0.001 | 0.876 | 0.879 | 0.005 | 0.001 |
| Sn <sup>2+</sup> | 0.831 | 0.926 | 0.849 | 0.828 | 0.990 | 0.942 | 0.912 | 0.305 |
| Zn <sup>2+</sup> | 0.840 | 0.807 | 0.693 | 0.938 | 0.962 | 0.248 | 0.205 | 0.899 |
